# Supplementary material
Source: PubMed Central journal article supplement (PMC6283663)
Supplement: NIHMS998796-supplement-Supplemental_Tables.pdf [file NIHMS998796-supplement-Supplemental_Tables.pdf]

## Supplementary Tables

**Supplementary Table 1. Number of monoclonal reads in each sample**

| Sample              | Number of cells | Total reads | Aligned reads | Monoclonal reads |
|---------------------|-----------------|-------------|---------------|------------------|
| H3K4me3_P12_rep1    | 1500            | 42406818    | 35819301      | 7951482          |
| H3K4me3_P12_rep2    | 1500            | 37451114    | 26531389      | 8494370          |
| H3K4me3_P15_rep1    | 1500            | 45562042    | 40449262      | 13629478         |
| H3K4me3_P15_rep2    | 1500            | 34095651    | 28941929      | 11216661         |
| H3K4me3_Oocyte_rep1 | 1000            | 64687515    | 25152463      | 18678880         |
| H3K4me3_Oocyte_rep2 | 1000            | 56962570    | 45504181      | 23149474         |
| H3K4me3_2-cell_rep1 | 1000            | 24533989    | 17552064      | 8237581          |
| H3K4me3_2-cell_rep2 | 1000            | 58565093    | 39766427      | 6967788          |
| H3K4me3_8-cell_rep1 | 1500            | 22409099    | 13868776      | 4913167          |
| H3K4me3_8-cell_rep2 | 1500            | 57241614    | 38082347      | 9971820          |
| H3K27ac_Oocyte_rep1 | 1000            | 47940097    | 30579189      | 1080322          |
| H3K27ac_Oocyte_rep2 | 1000            | 64831957    | 43908671      | 2712705          |
| H3K27ac_2-cell_rep1 | 1000            | 20018649    | 14678773      | 4470385          |
| H3K27ac_2-cell_rep2 | 1000            | 58017747    | 45751884      | 3163436          |
| H3K27ac_8-cell_rep1 | 1500            | 14728967    | 10072429      | 2377115          |
| H3K27ac_8-cell_rep2 | 1500            | 51818076    | 36478666      | 3350257          |
| Input_P12_rep1      | 1000            | 38148943    | 33707795      | 19403310         |
| Input_P12_rep2      | 1000            | 36507990    | 32250202      | 18562435         |
| Input_P15_rep1      | 1000            | 34694347    | 30555061      | 19088000         |
| Input_P15_rep2      | 1000            | 36609643    | 32243154      | 19265465         |
| Input_oocyte_rep1   | 1000            | 77683977    | 57809011      | 21063142         |
| Input_oocyte_rep2   | 1000            | 60585586    | 45572881      | 18133223         |
| Input_2cell_rep1    | 1000            | 25693778    | 18939115      | 14293389         |
| Input_2cell_rep2    | 1000            | 75331284    | 57525320      | 22266255         |
| Input_8cell_rep1    | 1000            | 23137193    | 17012428      | 13090336         |
| Input_8cell_rep2    | 1000            | 32939541    | 24612274      | 15384924         |

**Supplementary Table 2. KAPA qPCR based quantification of ChIP-seq libraries to assess relative amounts of H3K4me3 ChIP precipitated DNA**

| Sample | Ct   | dCt | Log   | Relative amount | Fraction |
|--------|------|-----|-------|-----------------|----------|
| Oocyte | 13.1 |     | 0.06  | 1.15            | 1.00     |
| 2-cell | 15.9 | 2.7 | -0.74 | 0.18            | 0.16     |
| 8-cell | 16.6 | 3.5 | -0.95 | 0.11            | 0.10     |
| P12    | 15.9 | 2.8 | -0.76 | 0.18            | 0.15     |
| P15    | 15.4 | 2.3 | -0.61 | 0.25            | 0.21     |

**Supplementary Table 3. Summary of WGBS results from P12 and P15**

| Sample | Bisulfite conversion rate | Coverage of CpG sites | Average CpG methylation | Average read depth of CpG sites |
|--------|---------------------------|-----------------------|-------------------------|---------------------------------|
| P12    | 99%                       | 93%                   | 19%                     | 9.06                            |
| P15    | 99%                       | 93%                   | 25%                     | 10.5                            |

**Supplementary Table 4. TF motif enrichment at distal cREs nearby ZGA genes**

| TF motif                                                 | Consensus sequence   | P value           |
|----------------------------------------------------------|----------------------|-------------------|
| RARg(NR)/ES-RARg-ChIP-Seq(GSE30538)/Homer                | AGGTCAAGGTCA         | 10 <sup>-67</sup> |
| RLR1?/SacCer-Promoters/Homer                             | WTTTTTCYTTT          | 10 <sup>-45</sup> |
| Nr5a2(NR)/mES-Nr5a2-ChIP-Seq/Homer                       | BTCAAGGTCA           | 10 <sup>-41</sup> |
| CRX(Homeobox)/Retina-Crx-ChIP-Seq/Homer                  | GCTAATCC             | 10 <sup>-38</sup> |
| Nr5a2(NR)/Pancreas-LRH1-ChIP-Seq(GSE34295)/Homer         | BTCAAGGTCA           | 10 <sup>-36</sup> |
| Pho2(bHLH)/Yeast-Pho2-ChIP-Seq(GSE29506)/Homer           | CCCACGTGCT           | 10 <sup>-30</sup> |
| c-Myc/mES-cMyc-ChIP-Seq/Homer                            | VVCCACGTGG           | 10 <sup>-27</sup> |
| n-Myc(HLH)/mES-nMyc-ChIP-Seq/Homer                       | VRCCACGTGG           | 10 <sup>-25</sup> |
| PIF5ox(bHLH)/Arabidopsis-PIF5ox-ChIP-Seq(GSE35062)/Homer | BCACGTGVDN           | 10 <sup>-21</sup> |
| ZNF143 STAF(Zf)/CUTLL-ZNF143-ChIP-Seq(GSE29600)/Homer    | ATTTCCCAGVAKSCY      | 10 <sup>-21</sup> |
| ARE(NR)/LNCAP-AR-ChIP-Seq(GSE27824)/Homer                | RGRACASNSTGTICYB     | 10 <sup>-20</sup> |
| Pitx1(Homeobox)/Chicken-Pitx1-ChIP-Seq(GSE38910)/Homer   | TAATCCCN             | 10 <sup>-19</sup> |
| Max(HLH)/K562-Max-ChIP-Seq/Homer                         | RCCACGTGGYYN         | 10 <sup>-18</sup> |
| Rfx5(HTH)/GM12878-Rfx5-ChIP-Seq(GSE31477)/Homer          | SCCTAGCAACAG         | 10 <sup>-17</sup> |
| Erra(NR)/HepG2-Erra-ChIP-Seq/Homer                       | CAAAGGTCAG           | 10 <sup>-17</sup> |
| BORIS(Zf)/K562-CTCF-ChIP-Seq/Homer                       | CNNBRGCGCCCCCTGSTGGC | 10 <sup>-15</sup> |
| Bcl6(Zf)/Liver-Bcl6-ChIP-Seq(GSE31578)/Homer             | NNNCTTCCAGGAAA       | 10 <sup>-15</sup> |
| PR(NR)/T47D-PR-ChIP-Seq(GSE31130)/Homer                  | VAGRACAKNCTGTBC      | 10 <sup>-12</sup> |
| GFY-Staf/Promoters/Homer                                 | RACTACAATTCCCAGAAKGC | 10 <sup>-12</sup> |
| GATA-DR8(Zf)/iTreg-Gata3-ChIP-Seq(GSE20898)/Homer        | AGATSTNDNNSAGATAASN  | 10 <sup>-11</sup> |
| Esrrb(NR)/mES-Esrrb-ChIP-Seq/Homer                       | KTGACCTTGA           | 10 <sup>-09</sup> |
| Gfi1b(Zf)/HPC7-Gfi1b-ChIP-Seq/Homer                      | MAATCACTGC           | 10 <sup>-08</sup> |
| FOXA1:AR/LNCAP-AR-ChIP-Seq(GSE27824)/Homer               | AGTAAACAAAAAGAACAND  | 10 <sup>-08</sup> |
| AR-halbsite(NR)/LNCaP-AR-ChIP-Seq(GSE27824)/Homer        | CCAGGAACAG           | 10 <sup>-08</sup> |
| FOXA1(Forkhead)/MCF7-FOXA1-ChIP-Seq/Homer                | WAAGTAAACA           | 10 <sup>-07</sup> |
| TR4(NR/DR1)/Hela-TR4-ChIP-Seq/Homer                      | GAGGTCAAAGGTCA       | 10 <sup>-06</sup> |
| TATA-box/SacCer-Promoters/Homer                          | BBHWTATATA           | 10 <sup>-05</sup> |
| MafK(bZIP)/C2C12-MafK-ChIP-Seq(GSE36030)/Homer           | GCTGASTCAGCA         | 10 <sup>-05</sup> |
| FOXA1(Forkhead)/LNCAP-FOXA1-ChIP-Seq(GSE27824)/Homer     | WAAGTAAACA           | 10 <sup>-05</sup> |
| p53(p53)/Saos-p53-ChIP-Seq/Homer                         | RRCATGYCYRGCATGYYYN  | 10 <sup>-05</sup> |

## Supplementary Table 5. Genome Ontology analysis of stage restricted putative distal cREs

| GO biological process                                        | -log <sub>10</sub> (P value) |
|--------------------------------------------------------------|------------------------------|
| <b>mESC-restricted distal cREs</b>                           |                              |
| Posttranscriptional regulation of gene expression            | 19.52                        |
| Stem cell development                                        | 16.32                        |
| Stem cell differentiation                                    | 16.19                        |
| Cell junction organization                                   | 16.08                        |
| Negative regulation of protein kinase activity               | 14.62                        |
| <b>Oocyte restricted distal cREs</b>                         |                              |
| Positive regulation of hormone biosynthetic process          | 25.63                        |
| Regulation of hormone biosynthetic process                   | 21.01                        |
| Positive regulation of hormone metabolic process             | 20.66                        |
| Regulation of lipid metabolic process                        | 18.53                        |
| Regulation of hormone metabolic process                      | 18.25                        |
| <b>2-cell restricted distal cREs</b>                         |                              |
| Cell cycle                                                   | 124.44                       |
| Protein modification by small protein conjugation or removal | 90.70                        |
| M phase                                                      | 88.60                        |
| Cell cycle phase                                             | 80.80                        |
| Cell division                                                | 80.38                        |
| <b>8-cell restricted distal cREs</b>                         |                              |
| Embryonic placenta development                               | 19.08                        |
| Placenta development                                         | 15.58                        |
| Regulation of circadian rhythm                               | 14.87                        |
| Negative regulation of glial cell differentiation            | 14.40                        |
| Regulation of gliogenesis                                    | 12.70                        |

## Supplementary Table 6. Enriched mouse phenotypes of stage restricted putative distal cREs

| Mouse phenotypes                                          | -log <sub>10</sub> (P value) |
|-----------------------------------------------------------|------------------------------|
| <b>mESC-restricted distal cREs</b>                        |                              |
| Decreased embryo size                                     | 50.57                        |
| Abnormal embryo size                                      | 49.48                        |
| Decreased erythrocyte cell number                         | 29.81                        |
| Small spleen                                              | 29.44                        |
| Abnormal erythrocyte cell number                          | 28.22                        |
| <b>Oocyte restricted distal cREs</b>                      |                              |
| Abnormal cell adhesion                                    | 22.97                        |
| Abnormal bone volume                                      | 19.49                        |
| Decreased percent body fat                                | 18.02                        |
| Abnormal cell migration                                   | 17.49                        |
| Abnormal endometrial gland morphology                     | 17.22                        |
| <b>2-cell restricted distal cREs</b>                      |                              |
| Embryonic lethality between implantation and placentation | 57.21                        |
| Complete embryonic lethality before somite formation      | 47.91                        |
| Embryonic lethality before somite formation               | 47.11                        |
| Decreased cell proliferation                              | 42.54                        |
| Abnormal cell content or morphology                       | 41.69                        |
| <b>8-cell restricted distal cREs</b>                      |                              |
| Long tail                                                 | 18.13                        |
| Abnormal allantois morphology                             | 16.07                        |
| Abnormal type II pneumocyte morphology                    | 15.05                        |
| Enlarged allantois                                        | 14.18                        |
| Abnormal pulmonary alveoli epithelial cell morphology     | 12.31                        |

**Supplementary Table 7. Enriched GO biological processes at nearby genes for each TF motif containing stage restricted putative distal cREs**

| Stage    | TF motif                        | Enriched top 3 GO biological processes           | P value |
|----------|---------------------------------|--------------------------------------------------|---------|
| Oocyte   | Jun-Ap1                         | negative regulation of signal transduction       | 7.4e-04 |
|          | Jun-Ap1                         | negative regulation of cell communication        | 1.4e-03 |
|          | Jun-Ap1                         | response to hormone stimulus                     | 2.2e-03 |
|          | BATCH2                          | negative regulation of signal transduction       | 1.2e-03 |
|          | BATCH2                          | intracellular signaling cascade                  | 1.4e-03 |
|          | BATCH2                          | actin filament-based process                     | 1.5e-03 |
|          | Nr5a2                           | enzyme linked receptor protein signaling pathway | 1.5e-04 |
|          | Nr5a2                           | fatty acid metabolic process                     | 3.8e-04 |
| 2-cell   | Nr5a2                           | negative regulation of signal transduction       | 7.4e-04 |
|          | cMyc                            | protein transport                                | 5.6e-09 |
|          | cMyc                            | establishment of protein localization            | 8.4e-09 |
|          | cMyc                            | protein localization                             | 3.7e-08 |
|          | RARg                            | protein transport                                | 2.0e-06 |
|          | RARg                            | macromolecule catabolic process                  | 2.4e-06 |
|          | RARg                            | establishment of protein localization            | 2.7e-06 |
|          | Rfx5                            | cell cycle                                       | 2.4e-11 |
| ZGA      | Rfx5                            | RNA processing                                   | 1.3e-08 |
|          | Rfx5                            | protein localization                             | 2.7E-07 |
|          | RARg                            | translation                                      | 1.2E-10 |
|          | RARg                            | cell cycle                                       | 4.6E-10 |
|          | RARg                            | RNA processing                                   | 5.2E-10 |
|          | RLR1                            | RNA processing                                   | 3.6E-15 |
|          | RLR1                            | cell cycle                                       | 3.5E-14 |
|          | RLR1                            | macromolecule catabolic process                  | 8.4E-14 |
|          | Nr5a2                           | macromolecule catabolic process                  | 3.7E-12 |
|          | Nr5a2                           | cellular macromolecule catabolic process         | 1.7E-11 |
|          | Nr5a2                           | protein catabolic process                        | 9.7E-11 |
|          | cMyc                            | RNA processing                                   | 5.0E-16 |
|          | cMyc                            | mRNA metabolic process                           | 1.1E-13 |
|          | cMyc                            | macromolecule catabolic process                  | 1.2E-12 |
|          | CRX                             | RNA processing                                   | 6.4E-17 |
|          | CRX                             | cellular macromolecule catabolic process         | 8.6E-15 |
| CRX      | macromolecule catabolic process | 2.4E-14                                          |         |
| 2/8-cell | RARg                            | macromolecule catabolic process                  | 3.2E-17 |
|          | RARg                            | cellular macromolecule catabolic process         | 4.6E-17 |
|          | RARg                            | cell cycle                                       | 2.6E-16 |
|          | Pho2                            | macromolecule catabolic process                  | 2.1E-13 |
|          | Pho2                            | cellular macromolecule catabolic process         | 3.9E-13 |
|          | Pho2                            | protein catabolic process                        | 4.7E-12 |
|          | Nr5a2                           | cellular macromolecule catabolic process         | 2.3E-17 |
|          | Nr5a2                           | macromolecule catabolic process                  | 4.4E-17 |
|          | Nr5a2                           | cell cycle                                       | 1.4E-15 |
| 8-cell   | RARg                            | phosphorus metabolic process                     | 2.0E-03 |
|          | RARg                            | phosphate metabolic process                      | 2.0E-03 |
|          | RARg                            | protein transport                                | 2.9E-03 |
|          | p53                             | heart morphogenesis                              | 2.8E-02 |
|          | p53                             | heart development                                | 4.4E-02 |
|          | p53                             | muscle tissue morphogenesis                      | 6.2E-02 |
|          | TEAD4                           | protein transport                                | 2.2E-05 |
|          | TEAD4                           | establishment of protein localization            | 2.7E-05 |
| ES-cell  | TEAD4                           | protein localization                             | 4.4E-05 |
|          | Oct4-Sox2-TCF-                  | tube development                                 | 7.9E-04 |
|          | Nanog                           |                                                  |         |
|          | Oct4-Sox2-TCF-                  | tube morphogenesis                               | 3.0E-03 |

|                |                                                        |         |
|----------------|--------------------------------------------------------|---------|
| Nanog          |                                                        |         |
| Oct4-Sox2-TCF- | positive regulation of macromolecule metabolic process | 3.2E-03 |
| Nanog          |                                                        |         |
| p53            | tolerance induction                                    | 1.3E-02 |
| p53            | cell division                                          | 5.9E-02 |
| Sox2           | tube development                                       | 2.5E-03 |
| Sox2           | establishment of cell polarity                         | 2.6E-03 |
| Sox2           | vesicle-mediated transport                             | 2.6E-03 |

**Supplementary Table 8. RNA-seq of Kdm5a and 5b morpholino targeted 2-cell embryos and various controls**

| Sample     | # of embryos | Replicate | Library Type | Uniquely mapped reads |
|------------|--------------|-----------|--------------|-----------------------|
| Uninjected | 25           | rep1      | Paired-end   | 12221992              |
| Uninjected | 25           | rep2      | Paired-end   | 10578894              |
| α-amanitin | 25           | rep1      | Paired-end   | 14844407              |
| α-amanitin | 25           | rep2      | Paired-end   | 11037116              |
| Kdm5a+b MO | 25           | rep1      | Paired-end   | 24831211              |
| Kdm5a+b MO | 25           | rep2      | Paired-end   | 19931118              |
| Control MO | 25           | rep1      | Paired-end   | 28897404              |
| Control MO | 25           | rep2      | Paired-end   | 19636896              |

**Supplementary Table 9. PANTHER Overrepresentation Test for down-regulated genes after Kdm5a+b MO injection**

| PANTHER GO-slim biological process | P value |
|------------------------------------|---------|
| Cell-cell signaling                | 1.5E-3  |
| Transport                          | 2.6E-2  |
| Metabolic process                  | 2.0E-2  |

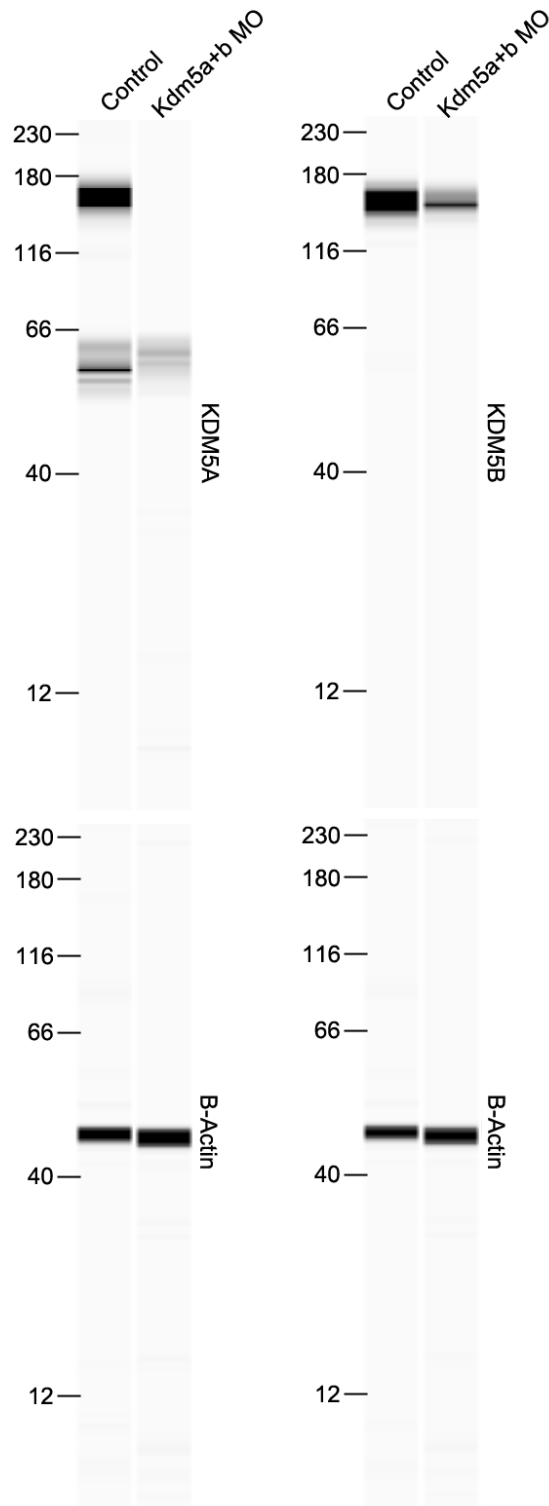

**Supplementary Figure 1.** Original Simple Western immunoblot images for Kdm5a and Kdm5b morpholino knock-down of KDM5A and KDM5B proteins in 2-cell embryos. Beta-actin is shown as loading control.
